# Supplementary material for: Mitogenomes Provide Insights Into the Evolution of Thoracotremata (Brachyura: Eubrachyura)
Source: Frontiers journal article supplement (doi:10.3389/fmars.2022.848203), 2022-04-14
Supplement: Table_1.XLS [file Table_1.XLS]

## Sheet: Sheet1
Species	Seed sequences	GenBank NO. of seed sequences
D1-Arcotheres sinensis	Arcotheres sinensis, cox1	JX502950
D2-Pinnotheres pholadis	Pinnotheres pholadis, 16S	LC430773
D3-Pinnotheres nigrans	Pinnotheres pholadis, 16S	LC430773
D4-Pinnotheres excussus	Pinnotheres pholadis, 16S	LC430773
D5-Amusiotheres obtusidentatus	Pinnotheres pholadis, 16S	LC430773
D6-Pinnaxodes major	Pinnaxodes chilensis, 16S	EU934998
O1-Tritodynamia horvathi	Tritodynamia horvathi, 16S	EU934953
O2-Cleistostoma dilatatum	Cleistostoma dilatatum, cox1	JX502895
O4-Xenophthalmus pinnotheroides	Xenophthalmus pinnotheroides, 16S	EU934951
G2-Plagusia squamosa	Plagusia squamosa, cox1	MW278033
G3-Asthenognathus inaequipes	Asthenognathus atlanticus, 16S	EU934952
SY-Hapalocarcinus marsupialis	Hapalocarcinus marsupialis, cox1	KX224358
