# Supplementary material for: Mitogenomes Provide Insights Into the Evolution of Thoracotremata (Brachyura: Eubrachyura)
Source: Frontiers journal article supplement (doi:10.3389/fmars.2022.848203), 2022-04-14
Supplement: Table_2.XLS [file Table_2.XLS]

## Sheet: Sheet1
Subsection	Superfamily	Family	Species	GenBank NO.
Thoracotremata	Ocypodoidea	Camptandriidae	Cleistostoma dilatatum	OL661264
		Xenophthalmidae	Xenophthalmus pinnotheroides	OL661265
		Macrophthalmidae	Tritodynamia horvathi	OL661263
			Macrophthalmus japonicus	KU343211
			Macrophthalmus darwinensis	MF457408
			Macrophthalmus abbreviatus	MN393095
			Macrophthalmus pacificus	MK584556
		Dotillidae	Dotilla wichmanni	MH183129
			Ilyoplax deschampsi	JF909979
			Scopimera intermedia	MW165226
		Mictyridae	Mictyris longicarpus	LN611670
		Ocypodidae	Ocypode cordimanus	KT896743
			Ocypode stimpsoni	MN917464
			Ocypode ceratophthalmus	MW255974
			Gelasimus borealis	MH183126
			Cranuca inversa	MF457405
			Tubuca capricornis	MF457401
			Tubuca polita	MF457400
			Tubuca paradussumieri	MN072633
			Austruca lactea	KY865330
			Tubuca rosea	MN072632
			Minuca minax	MT012731
	Grapsoidea	Xenograpsidae	Xenograpsus ngatama	KY985236
			Xenograpsus testudinatus	EU727203
		Grapsidae	Metopograpsus quadridentatus	MH183127
			Pachygrapsus crassipes	KC878511
			Grapsus tenuicrustatus	KT878721
			Pachygrapsus marmoratus	MF457403
			Metopograpsus frontalis	MH028874
			Grapsus albolineatus	MT755825
		Gecarcinidae	Cardisoma carnifex	MF461623
			Gecarcoidea lalandii	MW125543
			Cardisoma armatum	MW165227
		Varunidae	Eriocheir sinensis	KP064329
			Eriocheir hepuensis	MK159104
			Eriocheir japonica	FJ455505
			Helice tientsinensis	KR336555
			Helice latimera	KU589291
			Gaetice depressus	MH183128
			Helicana wuana	KX344898
			Hemigrapsus sanguineus	KX456205
			Varuna yui	MG756602
			Neoeriocheir leptognathus	MH593561
			Pseudohelice subquadrata	MH718959
			Chasmagnathus convexus	MK567986
			Varuna litterata	MF198252
			Hemigrapsus penicillatus	MG751772
			Metaplax longipes	MH899176
			Cyclograpsus intermedius	MT621398
			Asthenognathus inaequipes	OL661267
		Sesarmidae	Chiromantes eulimene	MN877385
			Sesarma neglectum	KX156954
			Parasesarma pictum	MG580780
			Nanosesarma minutum	MH899177
			Perisesarma bidens	KY808394
			Metopaulias depressus	KX118277
			Parasesarma tripectinis	KU343209
			Sesarmops sinensis	KR336554
			Clistocoeloma sinense	KU589292
			Parasesarma affine	MH310444
			Chiromantes dehaani	MH593563
			Chiromantes haematocheir	MH457175
		Plagusiidae	Plagusia squamosa	OL661266
	Cryptochiroidea	Cryptochiridae	Hapalocarcinus marsupialis	OL661268
	Pinnotheroidea	Pinnotheridae	Arcotheres sinensis	OL579740
			Pinnotheres pholadis	OL579739
			Pinnotheres nigrans	OL661260
			Pinnotheres excussus	OL661261
			Amusiotheres obtusidentatus	OL661262
			Pinnaxodes major	OL657229
Outgroups
Heterotremata	Portunoidea	Portunidae	Portunusgracilimanus	MH729187
	Leucosioidea	Leucosiidae	Pyrhila pisum	KU343210
	Calappoidea	Matutidae	Ashtoret lunaris	LK391941
	Xanthoidea	Xanthidae	Leptodius sanguineus	KT896744
	Bythograeoidea	Bythograeidae	Segonzacia mesatlantica	KY541839
	Pilumnoidea	Pilumnidae	Echinoecusnipponicus	MG574831
