# Supplementary material for: Mitogenomes Provide Insights Into the Evolution of Thoracotremata (Brachyura: Eubrachyura)
Source: Frontiers journal article supplement (doi:10.3389/fmars.2022.848203), 2022-04-14
Supplement: Table_3.XLS [file Table_3.XLS]

## Sheet: Sheet1
Subset	Best Model	# sites	Partition names
1	SYM+I+G	514	cox1_codon1
2	TVM+I+G	786	cox3_codon2,cox1_codon2
3	GTR+I+G	514	cox1_codon3
4	GTR+I+G	326	nad1_codon1
5	TVM+I+G	326	nad1_codon2
6	TIM+G	326	nad1_codon3
7	GTR+I+G	620	cytb_codon1,cox2_codon1
8	TVM+I+G	359	nad3_codon2,cox2_codon2
9	GTR+I+G	512	cox2_codon3,cox3_codon3
10	GTR+I+G	389	Atp8_codon1,nad2_codon1
11	GTR+I+G	336	nad2_codon2
12	TRN+G	336	nad2_codon3
13	GTR+I+G	272	cox3_codon1
14	GTR+I+G	346	nad3_codon1,Atp6_codon1
15	GTR+G	303	nad3_codon3,nad6_codon3
16	GTR+I+G	466	nad4_codon1
17	GTR+I+G	1052	nad4_codon2,nad5_codon2
18	TRN+I+G	571	nad4_codon3,nad4l_codon3
19	GTR+I+G	586	nad5_codon1
20	TIM+I+G	586	nad5_codon3
21	GTR+I+G	227	Atp6_codon2
22	TIM+I+G	227	Atp6_codon3
23	GTR+I+G	184	nad6_codon1
24	GTR+I+G	237	Atp8_codon2,nad6_codon2
25	K81UF+G	53	Atp8_codon3
26	TVM+I+G	380	cytb_codon2
27	GTR+I+G	380	cytb_codon3
28	TRN+I+G	105	nad4l_codon1
29	TVM+I+G	105	nad4l_codon2

## Sheet: Sheet3
Subset	Best	|	subset	id	|	Partition	names
1	SYM+I+G	514	cox1_codon1
2	TVM+I+G	786	cox3_codon2,	cox1_codon2
3	GTR+I+G	514	cox1_codon3
4	GTR+I+G	326	nad1_codon1
5	TVM+I+G	326	nad1_codon2
6	TIM+G	326	nad1_codon3
7	GTR+I+G	620	cytb_codon1,	cox2_codon1
8	TVM+I+G	359	nad3_codon2,	cox2_codon2
9	GTR+I+G	512	cox2_codon3,	cox3_codon3
10	GTR+I+G	389	Atp8_codon1,	nad2_codon1
11	GTR+I+G	336	nad2_codon2
12	TRN+G	336	nad2_codon3
13	GTR+I+G	272	cox3_codon1
14	GTR+I+G	346	nad3_codon1,	Atp6_codon1
15	GTR+G	303	nad3_codon3,	nad6_codon3
16	GTR+I+G	466	nad4_codon1
17	GTR+I+G	1052	nad4_codon2,	nad5_codon2
18	TRN+I+G	571	nad4_codon3,	nad4l_codon3
19	GTR+I+G	586	nad5_codon1
20	TIM+I+G	586	nad5_codon3
21	GTR+I+G	227	Atp6_codon2
22	TIM+I+G	227	Atp6_codon3
23	GTR+I+G	184	nad6_codon1
24	GTR+I+G	237	Atp8_codon2,	nad6_codon2
25	K81UF+G	53	Atp8_codon3
26	TVM+I+G	380	cytb_codon2
27	GTR+I+G	380	cytb_codon3
28	TRN+I+G	105	nad4l_codon1
29	TVM+I+G	105	nad4l_codon2
