# Supplementary material for: Mitogenomes Provide Insights Into the Evolution of Thoracotremata (Brachyura: Eubrachyura)
Source: Frontiers journal article supplement (doi:10.3389/fmars.2022.848203), 2022-04-14
Supplement: Table_4.XLS [file Table_4.XLS]

## Sheet: T. horvathi
Name	Strand	Start	Stop	Start-codon	Stop-codon	Anticodon		Length
cox1	+	1	1535	ATG	TA			1535
trnL2(tta)	+	1536	1600			1565	1567	65
cox2	+	1606	2304	ATG	TAA			699
atp8	+	2355	2516	ATG	TAA			162
atp6	+	2510	3184	ATT	TAA			675
cox3	+	3184	3974	ATG	TA			791
trnG(gga)	+	3973	4038			4004	4006	66
nad3	+	4047	4388	ATA	TAG			342
trnA(gca)	+	4393	4456			4424	4426	64
trnR(cga)	+	4459	452			4488	4490	-4006
trnN(aac)	+	4522	4587			4552	4554	66
trnS1(aga)	+	4590	4657			4617	4619	68
trnT(aca)	+	4725	4794			4761	4763	70
trnP(cca)	-	4793	4858			4827	4829	66
nad1	-	4881	5804	ATA	TAG			924
trnL1(cta)	-	5848	5914			5882	5884	67
rrnL	-	5915	7258					1344
rrnS	-	7292	8113					822
trnH(cac)	-	8204	8272			8238	8240	69
nad5	-	8301	10040	ATT	TAA			1740
trnV(gta)	-	10130	10202			10167	10169	73
trnQ(caa)	-	10924	10992			10960	10962	69
trnC(tgc)	-	10997	11061			11028	11030	65
trnY(tac)	-	11060	11127			11092	11094	68
trnK(aaa)	+	11141	11213			11173	11175	73
trnD(gac)	+	11210	11280			11245	11247	71
trnE(gaa)	+	11298	11364			11330	11332	67
trnF(ttc)	-	11382	11449			11417	11419	68
nad4	-	11478	12815	ATG	TAA			1338
nad4l	-	12809	13111	ATG	TAA			303
nad6	+	13203	13709	ATT	TAA			507
cob	+	13720	14854	ATG	T			1135
trnS2(tca)	+	14855	14920			14885	14887	66
trnI(atc)	+	15009	15075			15039	15041	67
trnM(atg)	+	15078	15147			15109	15111	70
nad2	+	15150	16157	ATT	TAG			1008
trnW(tga)	+	16155	16225			16186	16188	71

## Sheet: C. dilatatum
Name	Strand	Start	Stop	Start-codon	Stop-codon	Anticodon		Length
cox1	+	1	1539	ATG	TAA			1539
trnL2(tta)	+	1535	1599			1564	1566	65
cox2	+	1606	2293	ATG	T			688
trnK(aaa)	+	2294	2362			2324	2326	69
trnD(gac)	+	2363	2425			2393	2395	63
atp8	+	2426	2584	ATG	TAA			159
atp6	+	2599	3252	ATT	TAA			654
cox3	+	3252	4042	ATG	TA			791
trnG(gga)	+	4041	4106			4071	4073	66
nad3	+	4106	4456	ATC	TAA			351
trnA(gca)	+	4461	4525			4491	4493	65
trnR(cga)	+	4529	4594			4559	4561	66
trnN(aac)	+	4594	4662			4627	4629	69
trnS1(aga)	+	4663	4729			4689	4691	67
trnE(gaa)	+	4730	4795			4761	4763	66
trnH(cac)	-	4798	4862			4829	4831	65
trnF(ttc)	-	4864	4928			4896	4898	65
nad5	-	4929	6679	ATA	TA			1751
nad4	-	6697	8034	ATG	TAA			1338
nad4l	-	8028	8309	ATA	TAA			282
trnT(aca)	+	8340	8405			8371	8373	66
trnP(cca)	-	8405	8471			8439	8441	67
nad6	+	8455	8976	ATT	TAA			522
cob	+	8976	10110	ATG	T			1135
trnS2(tca)	+	10110	10178			10142	10144	69
nad1	-	10193	11140	GTG	TAA			948
trnL1(cta)	-	11165	11233			11200	11202	69
rrnL	-	11234	12546					1313
trnV(gta)	-	12547	12621			12585	12587	75
rrnS	-	12622	13442					821
trnI(atc)	+	14023	14090			14055	14057	68
trnQ(caa)	-	14086	14156			14123	14125	71
trnM(atg)	+	14164	14233			14195	14197	70
nad2	+	14246	15244	ATC	TAA			999
trnW(tga)	+	15243	15311			15273	15275	69
trnC(tgc)	-	15315	15380			15347	15349	66
trnY(tac)	-	15379	1			15410	15412	66

## Sheet: X. pinnotheroides
Name	Strand	Start	Stop	Start-codon	Stop-codon	Anticodon		Length
cox1	+	1	1539	ATG	TAA			1539
trnL2(tta)	+	1534	1600			1564	1566	67
cox2	+	1607	2294	ATG	T			688
trnK(aaa)	+	2294	2364			2325	2327	71
trnD(gac)	+	2363	2431			2393	2395	69
atp8	+	2432	2590	GTG	TAA			159
atp6	+	2584	3258	ATT	TAA			675
cox3	+	3258	4048	ATG	TA			791
trnG(gga)	+	4047	4114			4079	4081	68
nad3	+	4111	4464	ATA	TAA			354
trnA(gca)	+	4469	4534			4500	4502	66
trnR(cga)	+	4548	4611			4577	4579	64
trnN(aac)	+	4612	4678			4643	4645	67
trnS1(aga)	+	4681	4749			4708	4710	69
trnE(gaa)	+	4753	4817			4783	4785	65
trnH(cac)	-	5377	5443			5409	5411	67
trnF(ttc)	-	5444	5507			5475	5477	64
nad5	-	5507	7237	ATA	TAG			1731
nad4	-	7280	8617	ATG	TAA			1338
nad4l	-	8611	8922	ATT	TAA			312
trnT(aca)	+	8924	8991			8956	8958	68
trnP(cca)	-	8991	9060			9029	9031	70
nad6	+	9062	9568	ATT	TAA			507
cob	+	9568	10702	ATG	T			1135
trnS2(tca)	+	10702	10770			10733	10735	69
nad1	-	10914	11876	ATG	TAA			963
trnL1(cta)	-	11887	11952			11920	11922	66
rrnL	-	11953	13281					1329
trnV(gta)	-	13282	13356			13320	13322	75
rrnS	-	13357	14200					844
trnI(atc)	+	14784	14851			14815	14817	68
trnQ(caa)	-	14848	14918			14885	14887	71
trnM(atg)	+	14922	14990			14953	14955	69
nad2	+	14991	16001	ATG	TAA			1011
trnW(tga)	+	16000	16068			16030	16032	69
trnC(tgc)	-	16077	16145			16112	16114	69
trnY(tac)	-	16144	1			16175	16177	70

## Sheet: P. squamosa
Name	Strand	Start	Stop	Start-codon	Stop-codon	Anticodon		Length
cox1	+	1	1539	ATG	TAA			1539
trnL2(tta)	+	1534	1600			1564	1566	67
cox2	+	1606	2293	ATG	T			688
trnK(aaa)	+	2293	2364			2324	2326	72
trnD(gac)	+	2363	2427			2395	2397	65
atp8	+	2428	2586	ATG	TAA			159
atp6	+	2601	3254	ATT	TAA			654
cox3	+	3254	4045	ATT	TAA			792
trnG(gga)	+	4045	4108			4076	4078	64
nad3	+	4109	4457	ATC	T			349
trnA(gca)	+	4458	4521			4490	4492	64
trnR(cga)	+	4530	4595			4560	4562	66
trnN(aac)	+	4595	4659			4625	4627	65
trnS1(aga)	+	4660	4726			4685	4687	67
trnE(gaa)	+	4727	4794			4758	4760	68
trnH(cac)	-	4795	4859			4826	4828	65
trnF(ttc)	-	4870	4935			4901	4903	66
nad5	-	4939	6672	ATA	TAA			1734
nad4	-	6711	8054	ATT	TAA			1344
nad4l	-	8042	8344	ATG	TAA			303
trnT(aca)	+	8346	8414			8378	8380	69
trnP(cca)	-	8413	8481			8449	8451	69
nad6	+	8483	8986	ATT	TAA			504
cob	+	8986	10120	ATG	T			1135
trnS2(tca)	+	10121	10189			10152	10154	69
nad1	-	10206	11153	ATG	TAA			948
trnL1(cta)	-	11174	11242			11209	11211	69
rrnL	-	11243	12542					1300
trnV(gta)	-	12543	12616			12581	12583	74
rrnS	-	12617	13445					829
trnI(atc)	+	14025	14091			14055	14057	67
trnQ(caa)	-	14088	14158			14125	14127	71
trnM(atg)	+	14165	14236			14198	14200	72
nad2	+	14237	15247	ATG	TAG			1011
trnW(tga)	+	15246	15314			15276	15278	69
trnC(tgc)	-	15317	15381			15348	15350	65
trnY(tac)	-	15396	1			15428	15430	66

## Sheet: A. inaequipes 
Name	Strand	Start	Stop	Start-codon	Stop-codon	Anticodon		Length
cox1	+	1	1545	ATG	TAG			1545
trnL2(tta)	+	1536	1606			1567	1569	71
cox2	+	1615	2322	ATG	TAA			708
atp8	+	2346	2507	ATG	TAA			162
atp6	+	2522	3175	ATT	TAA			654
cox3	+	3175	3966	ATG	TAA			792
trnG(gga)	+	3966	4030			3998	4000	65
nad3	+	4031	4381	ATC	TAA			351
trnA(gca)	+	4383	4449			4415	4417	67
trnR(cga)	+	4448	4512			4478	4480	65
trnN(aac)	+	4511	4578			4545	4547	68
trnS1(aga)	+	4581	4646			4606	4608	66
trnT(aca)	+	4676	4746			4713	4715	71
trnP(cca)	-	4746	4810			4779	4781	65
nad1	-	4826	5794	ATA	TAG			969
rrnL	-	5828	7194					1367
rrnS	-	7250	8070					821
trnH(cac)	-	8136	8199			8167	8169	64
nad5	-	8202	9944	ATA	TAG			1743
trnV(gta)	-	10003	10070			10038	10040	68
trnL1(cta)	-	10087	10157			10125	10127	71
trnQ(caa)	-	10695	10763			10731	10733	69
trnC(tgc)	-	10771	10835			10802	10804	65
trnY(tac)	-	10834	10899			10865	10867	66
trnK(aaa)	+	10922	10993			10953	10955	72
trnD(gac)	+	10990	11066			11026	11028	77
trnE(gaa)	+	11077	11144			11109	11111	68
trnF(ttc)	-	11156	11221			11188	11190	66
nad4	-	11249	12595	ATT	TAA			1347
nad4l	-	12580	12858	GTG	TAA			279
nad6	+	12962	13477	ATA	TAA			516
cytb	+	13477	14611	ATG	T			1135
trnS2(tca)	+	14612	14677					66
trnI(atc)	+	14736	14804			14767	14769	69
trnM(atg)	+	14802	14873			14834	14836	72
nad2	+	14873	15883	ATC	TAG			1011
trnW(tga)	+	15882	15950			15912	15914	69

## Sheet: A. sinensis
Name	Strand	Start	Stop	Start-codon	Stop-codon	Anticodon		Length
cox1	+	1	1539	ATG	TAA			1539
trnL2(tta)	+	1531	1600			1564	1566	70
cox2	+	1636	2321	ATG	TA			686
trnK(aaa)	+	2322	2390			2352	2354	69
trnD(gac)	+	2389	2454			2420	2422	66
atp8	+	2454	2612	ATG	TAA			159
atp6	+	2606	3280	ATT	TAA			675
cox3	+	3285	4072	ATG	TA			788
trnG(gga)	+	4071	4134			4101	4103	64
nad3	+	4143	4487	ATA	TAA			345
trnA(gca)	+	4486	4551			4518	4520	66
trnS1(aga)	+	4606	4674			4631	4633	69
trnE(gaa)	+	4676	4740			4704	4706	65
trnN(aac)	+	4762	4827			4792	4794	66
trnR(cga)	+	4878	4941			4906	4908	64
trnH(cac)	-	4953	5017			4985	4987	65
trnF(ttc)	-	5018	5080			5048	5050	63
nad5	-	5080	6813	ATG	TAA			1734
nad4	-	6813	8188	GTG	TAA			1376
nad4l	-	8182	8484	ATG	TAA			303
trnT(aca)	+	8486	8552			8518	8520	67
nad6	+	8585	9088	ATC	TAA			504
cob	+	9088	10222	ATG	T			1135
trnS2(tca)	+	10222	10288			10256	10258	67
trnP(cca)	-	10918	10981			10947	10949	64
nad1	-	11092	12018	ATG	TAG			927
trnL1(cta)	-	12045	12111			12079	12081	67
rrnL	-	12112	13404					1293
trnV(gta)	-	13405	13478			13443	13445	74
rrnS	-	13479	14369					891
trnQ(caa)	-	14370	14438			14406	14408	69
trnI(atc)	+	15153	15215			15182	15184	63
trnM(atg)	+	15218	15290			15251	15253	73
nad2	+	15290	16300	ATT	TAG			1011
trnW(tga)	+	16298	16365			16329	16331	68
trnC(tgc)	-	16364	16427			16395	16397	64
trnY(tac)	-	16424	1			16457	16459	68

## Sheet: P. pholadis
Name	Strand	Start	Stop	Start-codon	Stop-codon	Anticodon		Length
cox1	+	1	1539	ATG	TAA			1539
trnL2(tta)	+	1535	1601			1564	1566	67
cox2	+	1605	2293	ATG	TA			689
trnK(aaa)	+	2294	2362			2324	2326	69
trnD(gac)	+	2361	2425			2392	2394	65
atp8	+	2425	2583	ATG	TAA			159
atp6	+	2577	3251	ATT	TAA			675
cox3	+	3258	4049	ATG	TAA	4078	4080	792
trnG(gga)	+	4049	4112					64
nad3	+	4113	4466	ATT	TAA			354
trnA(gca)	+	4464	4528			4495	4497	65
trnN(aac)	+	4556	4619			4586	4588	64
trnS1(aga)	+	4621	4689			4647	4649	69
trnE(gaa)	+	4694	4760			4722	4724	67
trnR(cga)	+	4774	4837			4802	4804	64
trnH(cac)	-	4847	4909			4877	4879	63
trnF(ttc)	-	4910	4973			4941	4943	64
nad5	-	4973	6703	ATA	TAA			1731
nad4	-	6721	8076	GTG	TAA			1356
nad4l	-	8070	8372	ATG	TAA			303
trnT(aca)	+	8374	8439			8406	8408	66
nad6	+	8443	8994	ATA	TAA			552
cob	+	8994	10128	ATG	T			1135
trnS2(tca)	+	10129	10193			10160	10162	65
trnP(cca)	-	10609	10674			10639	10641	66
nad1	-	10727	11623	GTG	TAA			897
trnL1(cta)	-	11647	11714			11681	11683	68
rrnL	-	11715	13010					1296
trnV(gta)	-	13011	13082			13048	13050	72
rrnS	-	13083	13970					888
trnQ(caa)	-	13971	14041			14008	14010	71
trnI(atc)	+	14736	14798			14765	14767	63
trnM(atg)	+	14801	14870			14834	14836	70
nad2	+	14870	15880	ATT	TAG			1011
trnW(tga)	+	15878	15947			15909	15911	70
trnC(tgc)	-	15946	16008			15976	15978	63
trnY(tac)	-	16007	1			16038	16040	66

## Sheet: P. nigrans 
Name	Strand	Start	Stop	Start-codon	Stop-codon	Anticodon		Length
cox1	+	1	1539	ATG	TAA			1539
trnL2(tta)	+	1534	1599			1564	1566	66
cox2	+	1620	2305	ATG	TA			686
trnK(aaa)	+	2306	2374			2336	2338	69
trnD(gac)	+	2373	2437			2404	2406	65
atp8	+	2437	2595	ATG	TAA			159
atp6	+	2589	3263	ATT	TAA			675
cox3	+	3269	4056	ATG	TA			788
trnG(gga)	+	4055	4119			4086	4088	65
nad3	+	4119	4472	ATT	TAA			354
trnA(gca)	+	4470	4537			4505	4507	68
trnS1(aga)	+	4596	4664			4622	4624	69
trnE(gaa)	+	4669	4732			4697	4699	64
trnN(aac)	+	4786	4849			4816	4818	64
trnR(cga)	+	4913	4977			4942	4944	65
trnH(cac)	-	4980	5042			5010	5012	63
trnF(ttc)	-	5043	5106			5074	5076	64
nad5	-	5106	6842	ATA	TAA			1737
nad4	-	6879	8219	ATT	TAG			1341
nad4l	-	8207	8509	ATG	TAA			303
trnT(aca)	+	8511	8577			8543	8545	67
nad6	+	8584	9114	ATC	TAA			531
cob	+	9114	10248	ATG	T			1135
trnS2(tca)	+	10249	10312			10281	10283	64
trnP(cca)	-	10674	10737			10702	10704	64
nad1	-	10949	11884	GTG	TAA			936
trnL1(cta)	-	11906	11973			11940	11942	68
rrnL	-	11974	13269					1296
trnV(gta)	-	13270	13341			13307	13309	72
rrnS	-	13342	14234					893
trnQ(caa)	-	14235	14305			14272	14274	71
trnI(atc)	+	15034	15096			15063	15065	63
trnM(atg)	+	15099	15169			15131	15133	71
nad2	+	15170	16180	ATT	TAG			1011
trnW(tga)	+	16178	16246			16209	16211	69
trnC(tgc)	-	16247	16307			16275	16277	61
trnY(tac)	-	16306	1			16338	16340	66

## Sheet: P. excussus
Name	Strand	Start	Stop	Start-codon	Stop-codon	Anticodon		Length
cox1	+	1	1539	ATG	TAA			1539
trnL2(tta)	+	1534	1605			1564	1566	72
cox2	+	1609	2298	ATG	TAA			690
trnK(aaa)	+	2296	2366			2327	2329	71
trnD(gac)	+	2563	2627			2594	2596	65
atp8	+	2627	2785	ATG	TAA			159
atp6	+	2770	3453	ATA	TAA			684
cox3	+	3459	4249	ATG	TA			791
trnG(gga)	+	4248	4312			4279	4281	65
nad3	+	4309	4665	ATA	TAA			357
trnA(gca)	+	4663	4729			4697	4699	67
trnS1(aga)	+	4786	4854			4812	4814	69
trnE(gaa)	+	4855	4916			4882	4884	62
trnN(aac)	+	4950	5014			4980	4982	65
trnR(cga)	+	5031	5097			5061	5063	67
trnH(cac)	-	5132	5193			5161	5163	62
trnF(ttc)	-	5194	5257			5225	5227	64
nad5	-	5257	6987	ATA	TAA			1731
nad4	-	6988	8364	ATT	TAG			1377
nad4l	-	8352	8654	ATG	TAA			303
trnT(aca)	+	8656	8723			8688	8690	68
nad6	+	8749	9264	ATA	TAA			516
cob	+	9264	10398	ATG	T			1135
trnS2(tca)	+	10399	10467			10433	10435	69
trnP(cca)	-	10632	10699			10667	10669	68
nad1	-	10720	11655	GTG	TAA			936
trnL1(cta)	-	11676	11743			11710	11712	68
rrnL	-	11744	13031					1288
trnV(gta)	-	13032	13104			13069	13071	73
rrnS	-	13105	13983					879
trnQ(caa)	-	13984	14052			14020	14022	69
trnI(atc)	+	14762	14825			14791	14793	64
trnM(atg)	+	14829	14900			14862	14864	72
nad2	+	14900	15910	ATC	TAA			1011
trnW(tga)	+	15908	15976			15939	15941	69
trnC(tgc)	-	15977	16037			16005	16007	61
trnY(tac)	-	16036	1			16057	16059	67

## Sheet: A. obtusidentatus
Name	Strand	Start	Stop	Start-codon	Stop-codon	Anticodon		Length
cox1	+	1	1539	ATG	TAA			1539
trnL2(tta)	+	1535	1600			1564	1566	66
cox2	+	1604	2292	ATG	TA			689
trnK(aaa)	+	2294	2360			2323	2325	67
trnD(gac)	+	2360	2424			2391	2393	65
atp8	+	2424	2582	ATG	TAA			159
atp6	+	2567	3250	ATT	TAA			684
cox3	+	3257	4047	ATG	TA			791
trnG(gga)	+	4046	4111			4076	4078	66
nad3	+	4108	4464	ATA	TAA			357
trnA(gca)	+	4462	4526			4493	4495	65
trnN(aac)	+	4569	4632			4599	4601	64
trnS1(aga)	+	4634	4702			4660	4662	69
trnE(gaa)	+	4704	4769			4732	4734	66
trnR(cga)	+	4783	4846			4812	4814	64
trnH(cac)	-	4858	4920			4888	4890	63
trnF(ttc)	-	4921	4984			4952	4954	64
nad5	-	4984	6714	ATA	TAG			1731
nad4	-	6711	8087	ATG	TAG			1377
nad4l	-	8081	8383	ATG	TAA			303
trnT(aca)	+	8385	8450			8417	8419	66
nad6	+	8454	8972	ATA	TAA			519
cob	+	9002	10136	ATG	T			1135
trnS2(tca)	+	10137	10201			10168	10170	65
trnP(cca)	-	10569	10635			10603	10605	67
nad1	-	10673	11617	GTG	TAA			945
trnL1(cta)	-	11623	11689			11656	11658	67
rrnL	-	11690	12984					1295
trnV(gta)	-	12985	13056			13022	13024	72
rrnS	-	13057	13942					886
trnQ(caa)	-	13943	14011			13979	13981	69
trnI(atc)	+	14750	14812			14779	14781	63
trnM(atg)	+	14815	14884			14848	14850	70
nad2	+	14884	15894	ATT	TAG			1011
trnW(tga)	+	15892	15961			15923	15925	70
trnC(tgc)	-	15960	16022			15990	15992	63
trnY(tac)	-	16021	1			16052	16054	66

[truncated: 2 more sheets: P. major , H. marsupialis]
