# Supplementary material for: Mitogenomes Provide Insights Into the Evolution of Thoracotremata (Brachyura: Eubrachyura)
Source: Frontiers journal article supplement (doi:10.3389/fmars.2022.848203), 2022-04-14
Supplement: Table_5.XLS [file Table_5.XLS]

## Sheet: Sheet1
Species	GenBank NO.	Mitogenome Size (bp)	Non-coding region (bp)	A+T	AT Skew	GC Skew
Cleistostoma dilatatum	OL661264	15443	717	69.0669	-0.00600038	-0.262299
Xenophthalmus pinnotheroides	OL661265	16212	1379	68.8626	0.0548191	-0.341125
Tritodynamia horvathi	OL661263	16235	1446	71.2165	-0.00294067	-0.251444
Macrophthalmus japonicus	KU343211	16170	1385	66.3946	0.0135991	-0.348546
Macrophthalmus darwinensis	MF457408	16348	1475	68.2915	0.00468637	-0.302795
Macrophthalmus abbreviatus	MN393095	16322	1573	67.2589	0.0331572	-0.350674
Macrophthalmus pacificus	MK584556	17226	2528	67.5473	0.0124645	-0.346931
Dotilla wichmanni	MH183129	15600	797	68.4551	-0.0139526	-0.313148
Ilyoplax deschampsi	JF909979	15460	716	69.6184	-0.0190467	-0.294017
Scopimera intermedia	MW165226	16252	768	69.0651	0.0230817	-0.220852
Mictyris longicarpus	LN611670	15548	775	69.0121	-0.060205	-0.236198
Ocypode cordimanus	KT896743	15604	861	66.342	-0.0409583	-0.293222
Ocypode stimpsoni	MN917464	15557	810	67.783	-0.00578473	-0.292099
Ocypode ceratophthalmus	MW255974	15555	783	69.4162	-0.0275076	-0.27181
Gelasimus borealis	MH183126	15659	877	69.4106	0.00929248	-0.246764
Cranuca inversa	MF457405	15677	929	70.9702	0.0079094	-0.246319
Tubuca capricornis	MF457401	15629	866	70.4908	0.00662612	-0.227667
Tubuca polita	MF457400	15672	903	71.5926	0.0222816	-0.232704
Tubuca paradussumieri	MN072633	15614	835	70.8147	0.012933	-0.246434
Austruca lactea	KY865330	15659	890	69.4872	0.002849	-0.214316
Tubuca rosea	MN072632	15643	877	71.1226	0.0290337	-0.28758
Minuca minax	MT012731	15937	N/A	73.1003	-0.0147639	-0.236762
Xenograpsus ngatama	KY985236	16106	1653	72.9356	-0.0103005	-0.292957
Xenograpsus testudinatus	EU727203	15798	1072	73.9144	-0.00693671	-0.28561
Metopograpsus quadridentatus	MH183127	15517	725	70.3035	-0.0250252	-0.314236
Pachygrapsus crassipes	KC878511	15652	809	66.2791	-0.0800077	-0.24479
Grapsus tenuicrustatus	KT878721	15858	703	65.0271	-0.0182312	-0.306527
Pachygrapsus marmoratus	MF457403	15406	650	68.3824	-0.0817276	-0.232601
Metopograpsus frontalis	MH028874	15587	752	69.7248	-0.0599926	-0.272727
Grapsus albolineatus	MT755825	15578	821	67.3627	-0.00867907	-0.263386
Cardisoma carnifex	MF461623	15597	833	68.8594	0.0284916	-0.348157
Gecarcoidea lalandii	MW125543	15575	821	74.9535	0.00496831	-0.26224
Cardisoma armatum	MW165227	15586	827	69.062	0.0230398	-0.335131
Eriocheir sinensis	KP064329	16350	1513	71.6881	-0.0147598	-0.245193
Eriocheir hepuensis	MK159104	16397	1569	71.7814	-0.0203908	-0.236222
Eriocheir japonica	FJ455505	16352	1517	71.6182	-0.0180172	-0.244559
Helice tientsinensis	KR336555	16212	1459	69.06	-0.0173276	-0.289075
Helice latimera	KU589291	16246	1493	69.1062	-0.0168344	-0.289898
Gaetice depressus	MH183128	16288	1501	72.9617	-0.0301245	-0.222525
Helicana wuana	KX344898	16359	1610	68.4211	-0.0367194	-0.26868
Hemigrapsus sanguineus	KX456205	16275	1491	69.7634	-0.0176149	-0.260313
Varuna yui	MG756602	15915	1076	72.1817	-0.0108819	-0.264965
Neoeriocheir leptognathus	MH593561	16143	1304	74.6454	-0.0461411	-0.205961
Pseudohelice subquadrata	MH718959	16898	1665	67.724	0.00961202	-0.346535
Chasmagnathus convexus	MK567986	15107	1359	67.0219	-0.0202469	-0.26937
Varuna litterata	MF198252	16247	1459	72.081	-0.0123815	-0.2597
Hemigrapsus penicillatus	MG751772	16486	1731	70.5265	-0.0334566	-0.228648
Metaplax longipes	MH899176	16305	1380	71.4443	0.0527942	-0.256873
Cyclograpsus intermedius	MT621398	16184	1430	70.5944	-0.0174179	-0.270435
Chiromantes eulimene	MN877385	15894	1127	75.5316	-0.0169096	-0.20648
Sesarma neglectum	KX156954	15920	1120	75.6344	-0.0103812	-0.219386
Parasesarma pictum	MG580780	15611	812	75.6005	-0.0316895	-0.194539
Nanosesarma minutum	MH899177	15637	874	77.6875	-0.0223905	-0.200917
Perisesarma bidens	KY808394	15641	1494	74.8098	-0.0212802	-0.201523
Metopaulias depressus	KX118277	15765	1135	77.3232	-0.0185398	-0.231888
Parasesarma tripectinis	KU343209	15612	705	74.2185	-0.0235609	-0.215404
Sesarmops sinensis	KR336554	15905	1459	75.6806	-0.0123785	-0.228025
Clistocoeloma sinense	KU589292	15706	872	75.7227	-0.0199277	-0.228954
Parasesarma affine	MH310444	15638	867	74.8305	-0.0217057	-0.200203
Chiromantes dehaani	MH593563	15917	1124	75.6864	-0.01021	-0.219638
Chiromantes haematocheir	MH457175	15899	1104	75.6085	-0.0125614	-0.22589
Plagusia squamosa	OL661266	15460	717	69.9224	-0.0175763	-0.253763
Asthenognathus inaequipes	OL661267	15959	1111	70.1986	0.0216906	-0.285534
Hapalocarcinus marsupialis	OL661268	15422	624	69.539	0.0191428	-0.305052
Arcotheres sinensis	OL579740	16490	1697	71.6374	-0.0244646	-0.298268
Pinnotheres pholadis	OL579739	16071	1270	72.0366	-0.0152889	-0.255007
Pinnotheres nigrans	OL661260	16371	1571	69.6414	0.0090343	-0.330382
Pinnotheres excussus	OL661261	16101	1284	72.4551	-0.0370307	-0.291094
Amusiotheres obtusidentatus	OL661262	16085	1230	74.1933	-0.0326797	-0.227174
Pinnaxodes major	OL657229	16233	1380	68.3423	-0.0126194	-0.303366
