# Supplementary material for: Mitogenomes Provide Insights Into the Evolution of Thoracotremata (Brachyura: Eubrachyura)
Source: Frontiers journal article supplement (doi:10.3389/fmars.2022.848203), 2022-04-14
Supplement: Table_6.XLS [file Table_6.XLS]

## Sheet: Sheet1
Species	GenBank NO.	Breakpoint distances	Branch lengths
Hapalocarcinus marsupialis	OL661268	5	0.9631
Arcotheres sinensis	OL579740	10	0.6086
Pinnotheres pholadis	OL579739	9	0.5218
Pinnotheres nigrans	OL661260	10	0.5534
Pinnotheres excussus	OL661261	10	0.5619
Amusiotheres obtusidentatus	OL661262	9	0.5592
Pinnaxodes major	OL657229	9	0.8122
Tritodynamia horvathi	OL661263	17	0.8096
Cleistostoma dilatatum	OL661264	0	0.69
Xenophthalmus pinnotheroides	OL661265	0	0.8298
Macrophthalmus japonicus	KU343211	17	0.7791
Macrophthalmus darwinensis	MF457408	17	0.8601
Macrophthalmus abbreviatus	MN393095	17	0.842
Macrophthalmus pacificus	MK584556	17	0.7682
Dotilla wichmanni	MH183129	0	0.7639
Ilyoplax deschampsi	JF909979	0	0.7987
Scopimera intermedia	MW165226	0	0.8468
Mictyris longicarpus	LN611670	0	0.8371
Ocypode cordimanus	KT896743	0	0.7237
Ocypode stimpsoni	MN917464	0	0.8354
Ocypode ceratophthalmus	MW255974	0	0.7634
Gelasimus borealis	MH183126	0	0.7476
Cranuca inversa	MF457405	0	0.7434
Tubuca capricornis	MF457401	0	0.7696
Tubuca polita	MF457400	0	0.7945
Tubuca paradussumieri	MN072633	0	0.7556
Austruca lactea	KY865330	0	0.8182
Tubuca rosea	MN072632	0	0.694
Minuca minax	MT012731	0	0.7071
Xenograpsus ngatama	KY985236	12	0.88
Xenograpsus testudinatus	EU727203	14	0.8799
Metopograpsus quadridentatus	MH183127	0	0.7354
Pachygrapsus crassipes	KC878511	0	0.7953
Grapsus tenuicrustatus	KT878721	0	0.7679
Pachygrapsus marmoratus	MF457403	0	0.7797
Metopograpsus frontalis	MH028874	0	0.7719
Grapsus albolineatus	MT755825	0	0.8685
Cardisoma carnifex	MF461623	0	0.5643
Gecarcoidea lalandii	MW125543	0	0.6586
Cardisoma armatum	MW165227	0	0.5567
Eriocheir sinensis	KP064329	17	0.7934
Eriocheir hepuensis	MK159104	17	0.7814
Eriocheir japonica	FJ455505	17	0.7995
Helice tientsinensis	KR336555	17	0.6667
Helice latimera	KU589291	17	0.6653
Gaetice depressus	MH183128	17	0.8339
Helicana wuana	KX344898	17	0.6891
Hemigrapsus sanguineus	KX456205	17	0.8086
Varuna yui	MG756602	17	0.8704
Neoeriocheir leptognathus	MH593561	17	0.9356
Pseudohelice subquadrata	MH718959	17	0.68
Chasmagnathus convexus	MK567986	17	0.6874
Varuna litterata	MF198252	17	0.8724
Hemigrapsus penicillatus	MG751772	17	0.8452
Metaplax longipes	MH899176	17	0.8103
Cyclograpsus intermedius	MT621398	17	0.682
Chiromantes eulimene	MN877385	3	0.7918
Sesarma neglectum	KX156954	3	0.7905
Parasesarma pictum	MG580780	3	0.8742
Nanosesarma minutum	MH899177	3	0.9902
Perisesarma bidens	KY808394	3	0.9113
Metopaulias depressus	KX118277	3	0.9789
Parasesarma tripectinis	KU343209	3	0.8985
Sesarmops sinensis	KR336554	3	0.7974
Clistocoeloma sinense	KU589292	3	0.8326
Parasesarma affine	MH310444	3	0.9089
Chiromantes dehaani	MH593563	3	0.7896
Chiromantes haematocheir	MH457175	3	0.7996
Plagusia squamosa	OL661266	0	0.6964
Asthenognathus inaequipes	OL661267	19	0.8351
